# Supplementary material for: Revealing an unusual temperature-dependent CO2 adsorption trend and selective CO2 uptake over water vapors in a polyamine-appended metal–organic framework
Source: Royal Society of Chemistry journal article supplement (doi:10.1039/c9qm00581a), 2019-01-01
Supplement: c9qm00581a1.pdf [file c9qm00581a1.pdf]

## Supporting Information

### **Revealing unusual temperature-dependent CO<sub>2</sub> adsorption trend and selective CO<sub>2</sub> uptake over water vapors in a polyamine-appended metal-organic framework**

Jong Hyeak Choe,<sup>a</sup> Dong Won Kang,<sup>a</sup> Minjung Kang,<sup>a</sup> Hyojin Kim,<sup>a</sup> Jeoung Ryul Park,<sup>a</sup> Dae Won Kim,<sup>a</sup> and Chang Seop Hong<sup>a\*</sup>

<sup>a</sup> *Department of Chemistry, Korea University, Seoul 02841, Republic of Korea.*

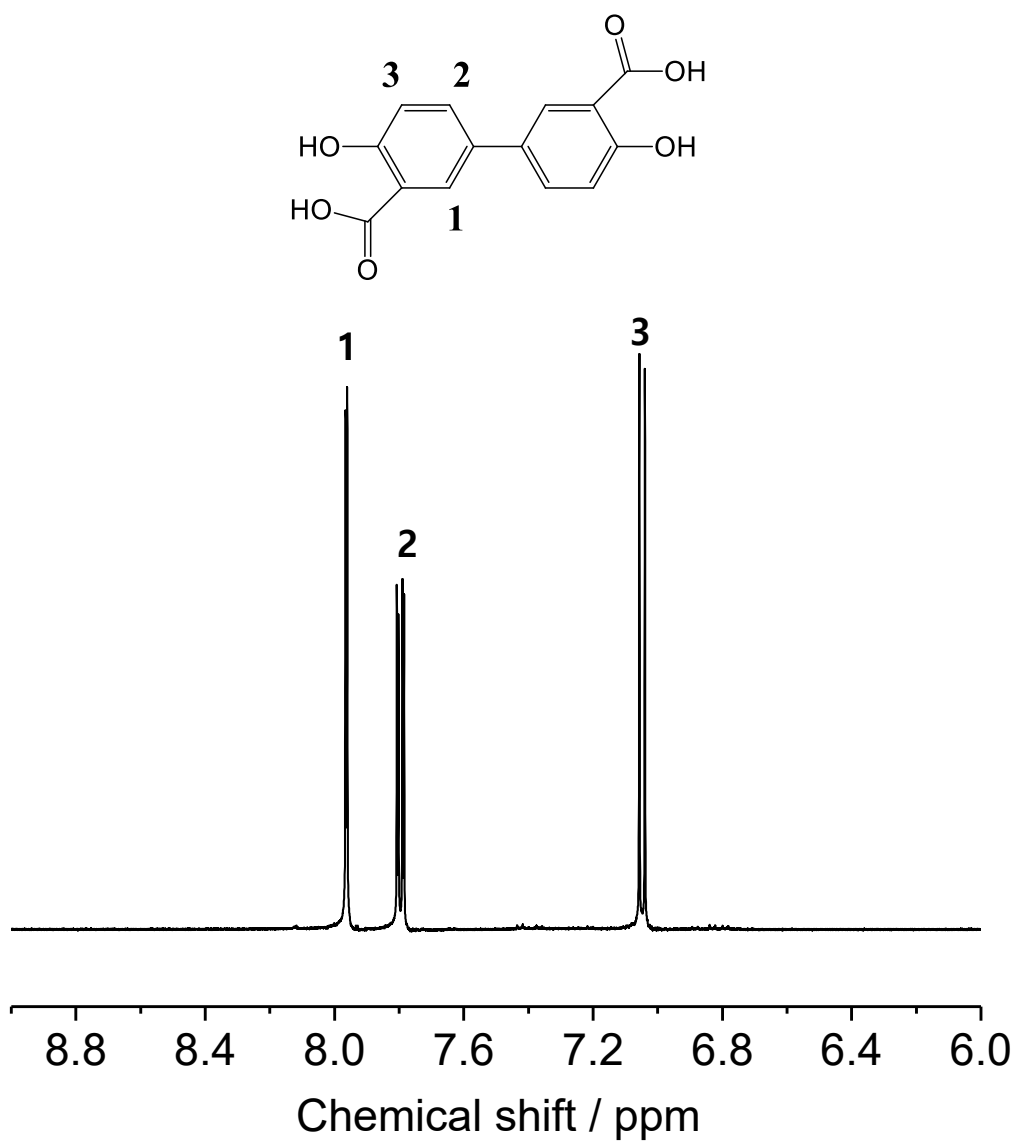

**Fig. S1**  $^1H$  NMR of  $H_4dobpdc$  (NMR solvent:  $DMSO-d_6$ ).

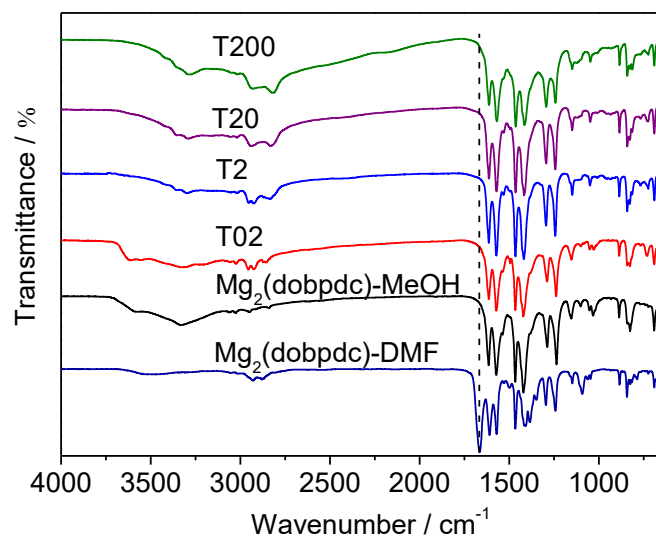

**Fig. S2** FT-IR data of Mg<sub>2</sub>(dobpdc)-DMF, Mg<sub>2</sub>(dobpdc)-MeOH, and teпа-grafted samples.

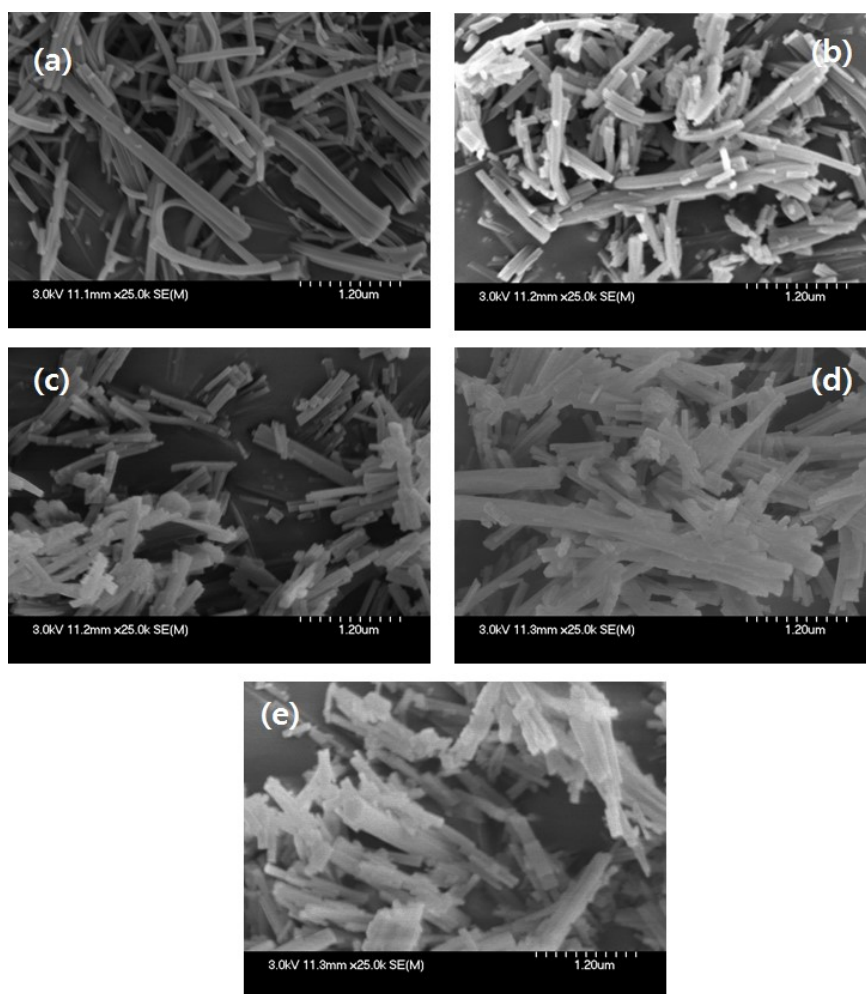

**Fig. S3** SEM images of (a) Mg<sub>2</sub>(dobpdc), (b) T02, (c) T2, (d) T20, and (e) T200.

(a)

| XPS         | Mg (%) | N (%) | O (%) | C (%) |
|-------------|--------|-------|-------|-------|
| <b>T02</b>  | 5.4    | 5.1   | 24.1  | 65.4  |
| <b>T2</b>   | 3.8    | 14.1  | 18.7  | 63.5  |
| <b>T20</b>  | 3.9    | 16.8  | 18.6  | 60.7  |
| <b>T200</b> | 3.5    | 18.2  | 17.3  | 60.8  |

(b)

| Elemental analysis | N (%) | C (%) | H (%) |
|--------------------|-------|-------|-------|
| <b>T02</b>         | 1.98  | 49.20 | 4.39  |
| <b>T2</b>          | 12.40 | 50.23 | 5.80  |
| <b>T20</b>         | 14.35 | 49.90 | 6.67  |
| <b>T200</b>        | 16.11 | 48.65 | 6.81  |

**Table. S1** Composition of tepa-grafted MOFs through (a) XPS and (b) elemental analysis.

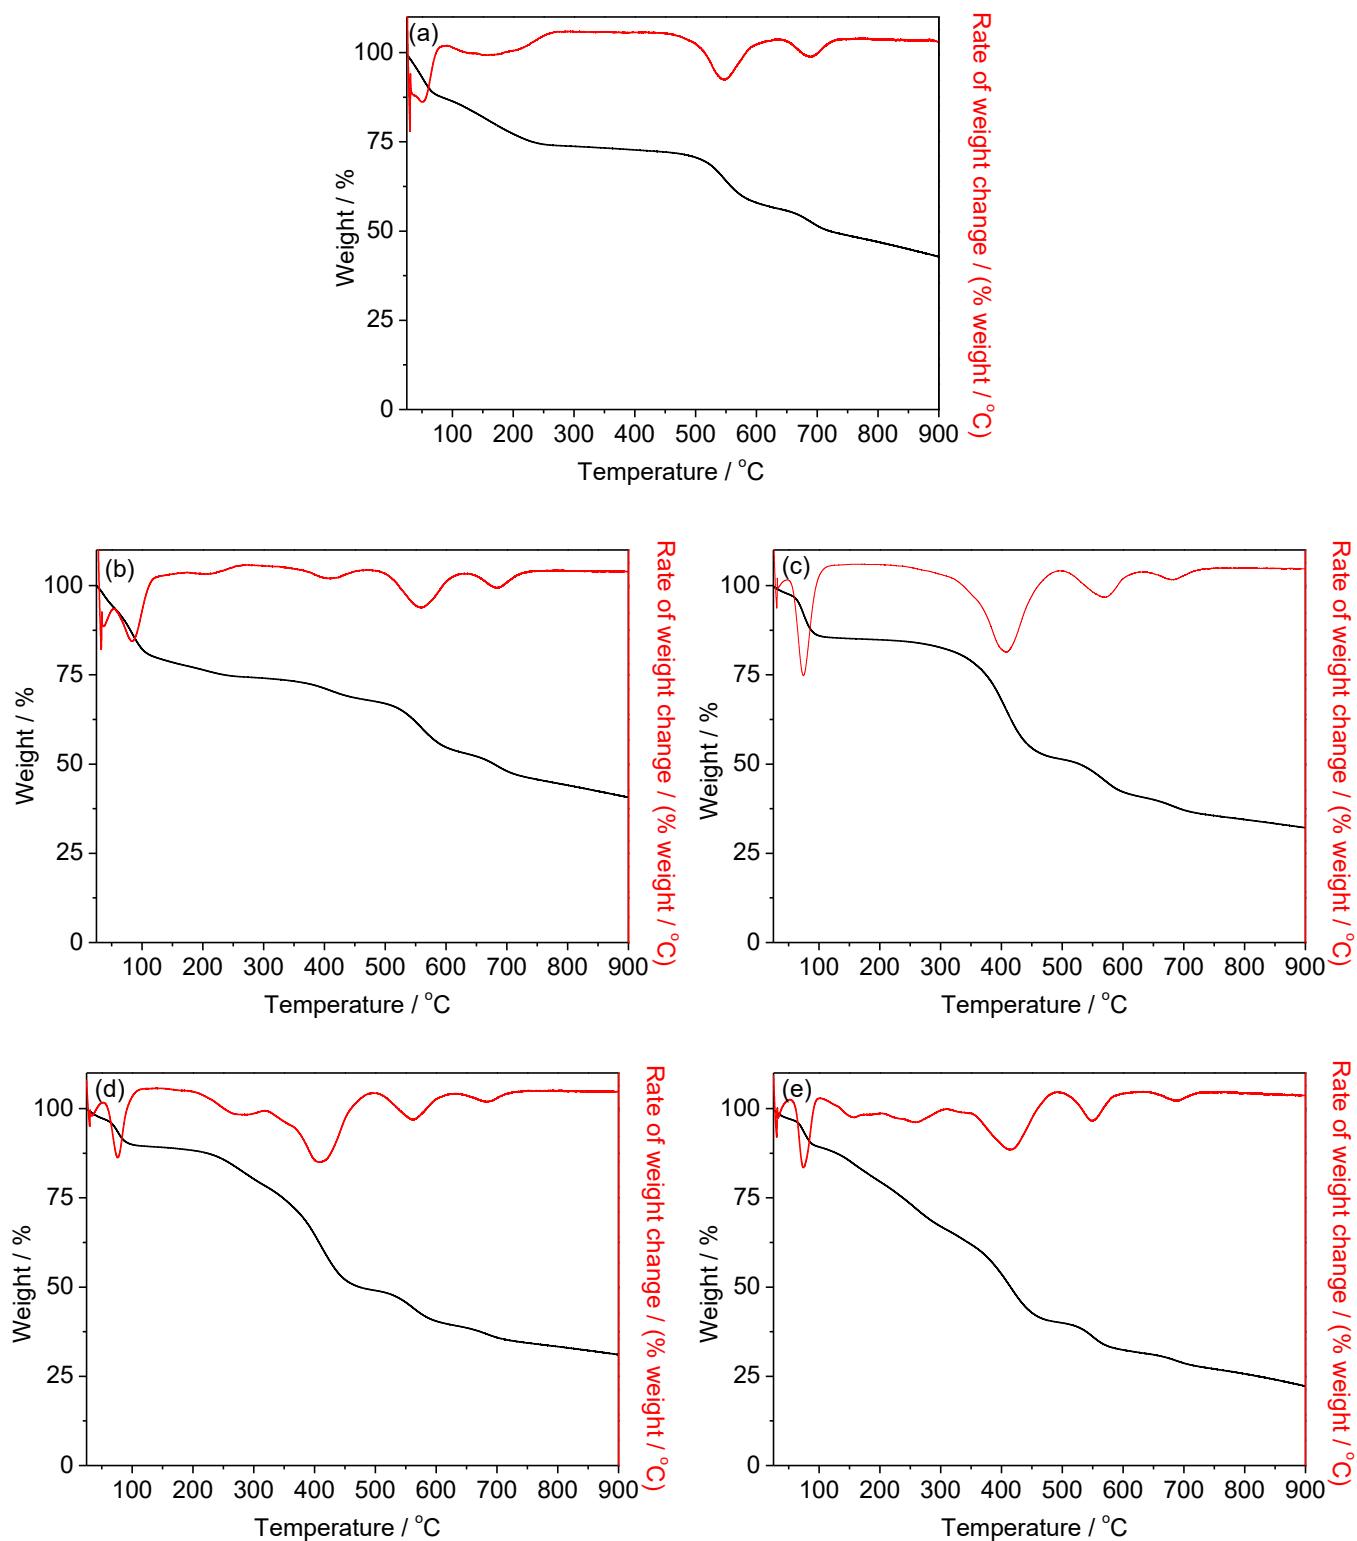

**Fig. S4** Dry N<sub>2</sub> decomposition curves of (a)  $Mg_2(dobpdc)$ , (b) T02, (c) T2, (d) T20, and (e) T200. A ramp rate was 3 °C/min.

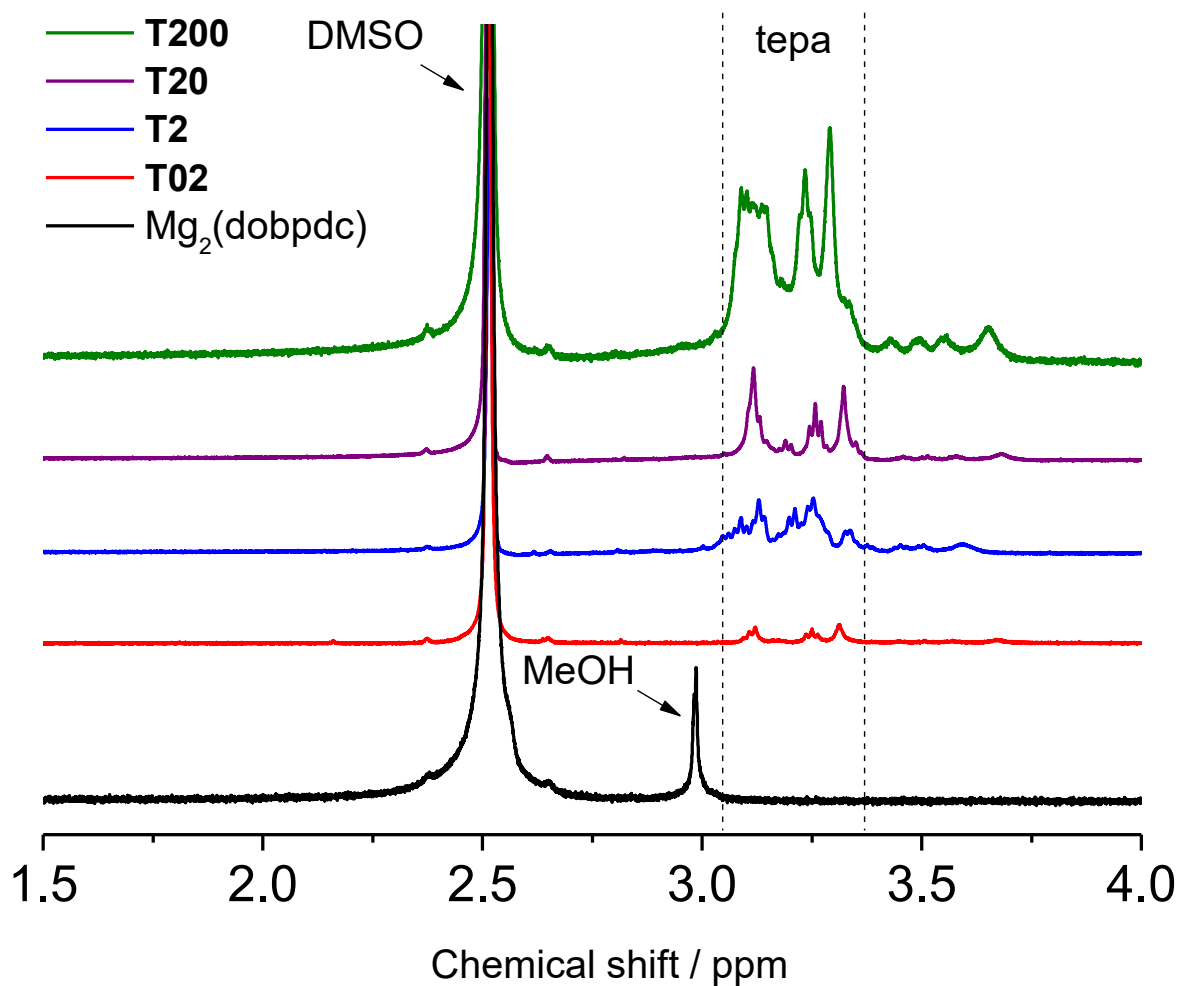

**Fig. S5** Determination about teпа-loadings on MOFs (0.05 mmol) by  $^1\text{H}$  NMR after digestion with DCl (35 wt% in  $\text{D}_2\text{O}$ ) in  $\text{DMSO-}d_6$

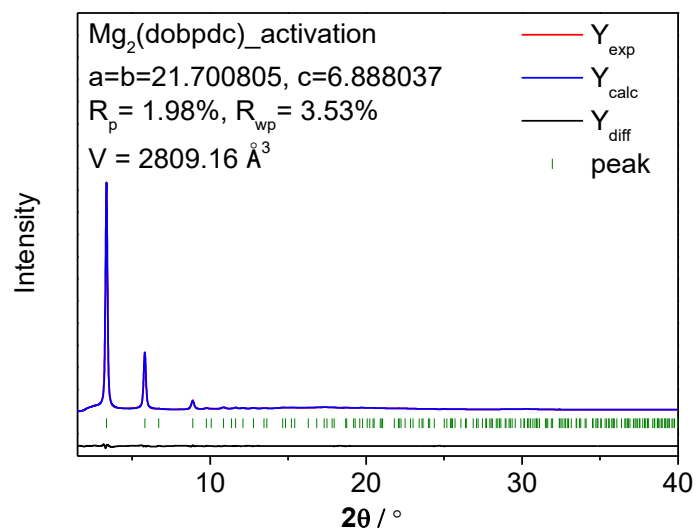

**Fig. S6** Synchrotron powder X-ray diffraction pattern of  $\text{Mg}_2(\text{dobpdc})$  with calculated diffraction pattern (blue) from Pawley refinement with difference (black).

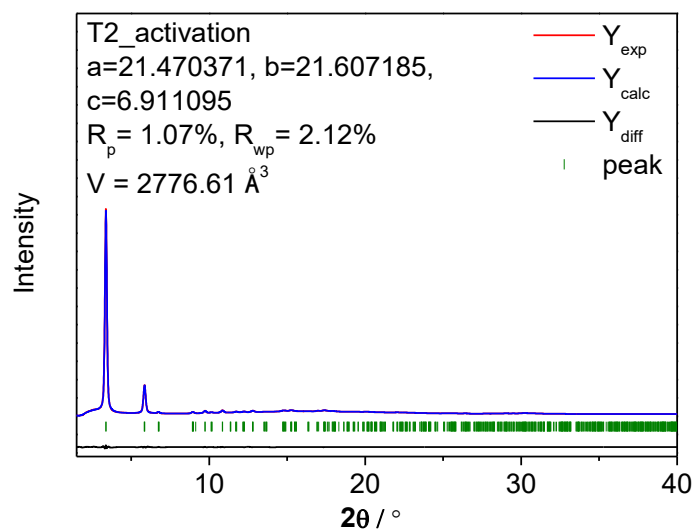

**Fig. S7** Synchrotron powder X-ray diffraction pattern of **T2**-activated with calculated diffraction pattern (blue) from Pawley refinement with difference (black).

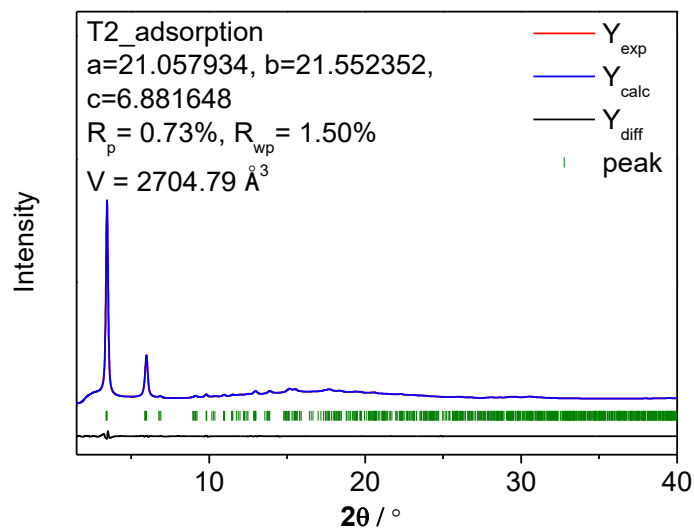

**Fig. S8** Synchrotron powder X-ray diffraction pattern of **T2**-CO<sub>2</sub>-captured with calculated diffraction pattern (blue) from Pawley refinement with difference (black).

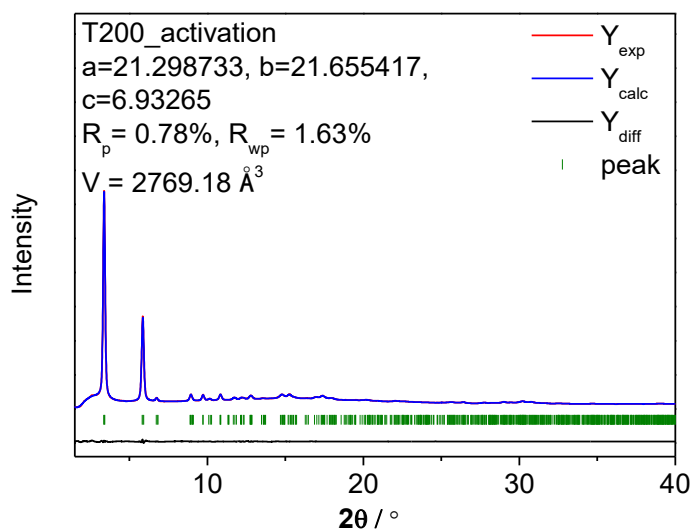

**Fig. S9** Synchrotron powder X-ray diffraction pattern of **T200**-activated with calculated diffraction pattern (blue) from Pawley refinement with difference (black).



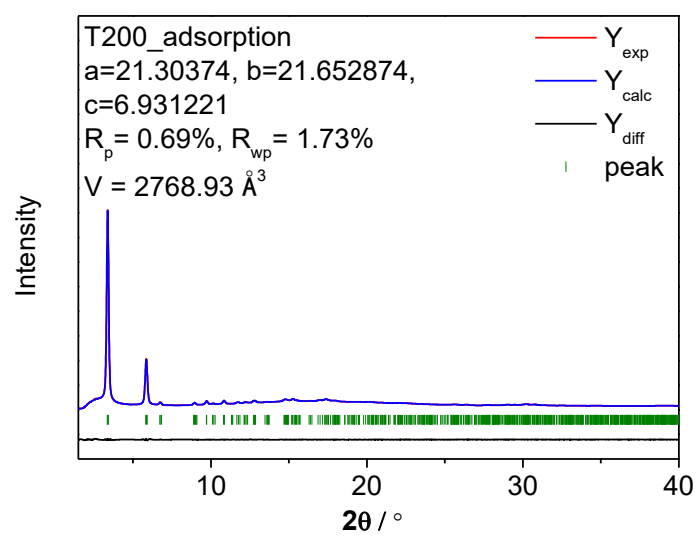

**Fig. S10** Synchrotron powder X-ray diffraction pattern of **T200**-CO<sub>2</sub>-captured with calculated diffraction pattern (blue) from Pawley refinement with difference (black).

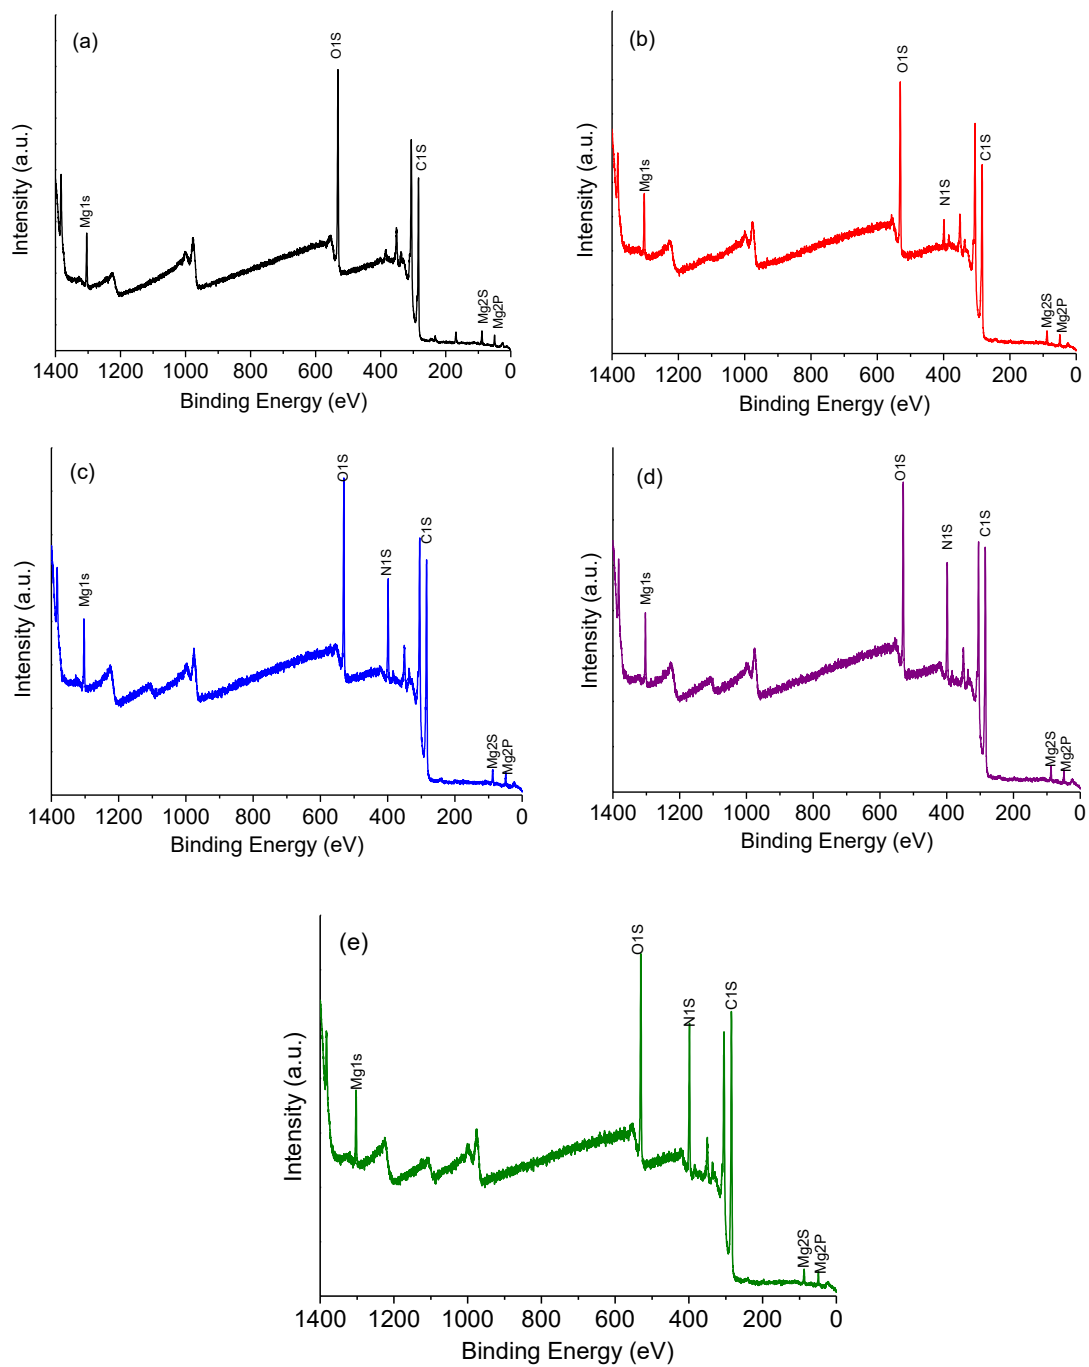

**Fig. S11** Survey XPS scan for (a)  $Mg_2(dobpdc)$ , (b) T02, (c) T2, (d) T20, and (e) T200.

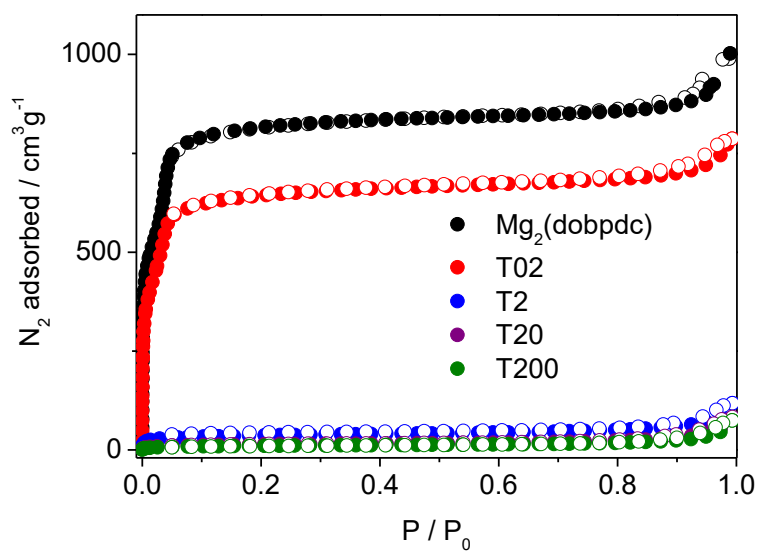

(a)

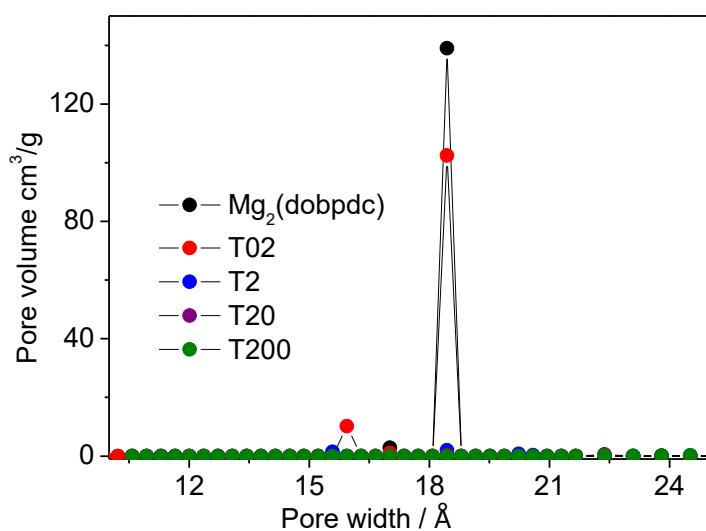

(b)

**Fig. S12** N<sub>2</sub> adsorption isotherms of (a) Mg<sub>2</sub>(dobpdc) and teпа-grafted MOFs at 77 K, and (b) DFT pore size distribution calculated from the N<sub>2</sub> adsorption at 77 K using cylindrical pores with oxide surface.

|                          | S <sub>bet</sub> (m <sup>2</sup> /g) | S <sub>L</sub> (m <sup>2</sup> /g) | PV (cm <sup>3</sup> /g) at 19.5 Å <sup>a</sup> |
|--------------------------|--------------------------------------|------------------------------------|------------------------------------------------|
| Mg <sub>2</sub> (dobpdc) | 3178                                 | 3743                               | 138                                            |
| <b>T02</b>               | 2372                                 | 2903                               | 101                                            |
| <b>T2</b>                | 131                                  | 175                                | 2.07                                           |
| <b>T20</b>               | 51                                   | 67                                 | 0.45                                           |
| <b>T200</b>              | 36                                   | 48                                 | 0.03                                           |

<sup>a</sup> Micropore volume calculated from the nitrogen isotherm.

**Table. S2** Porous properties of Mg<sub>2</sub>(dobpdc) and teпа-grafted MOFs.

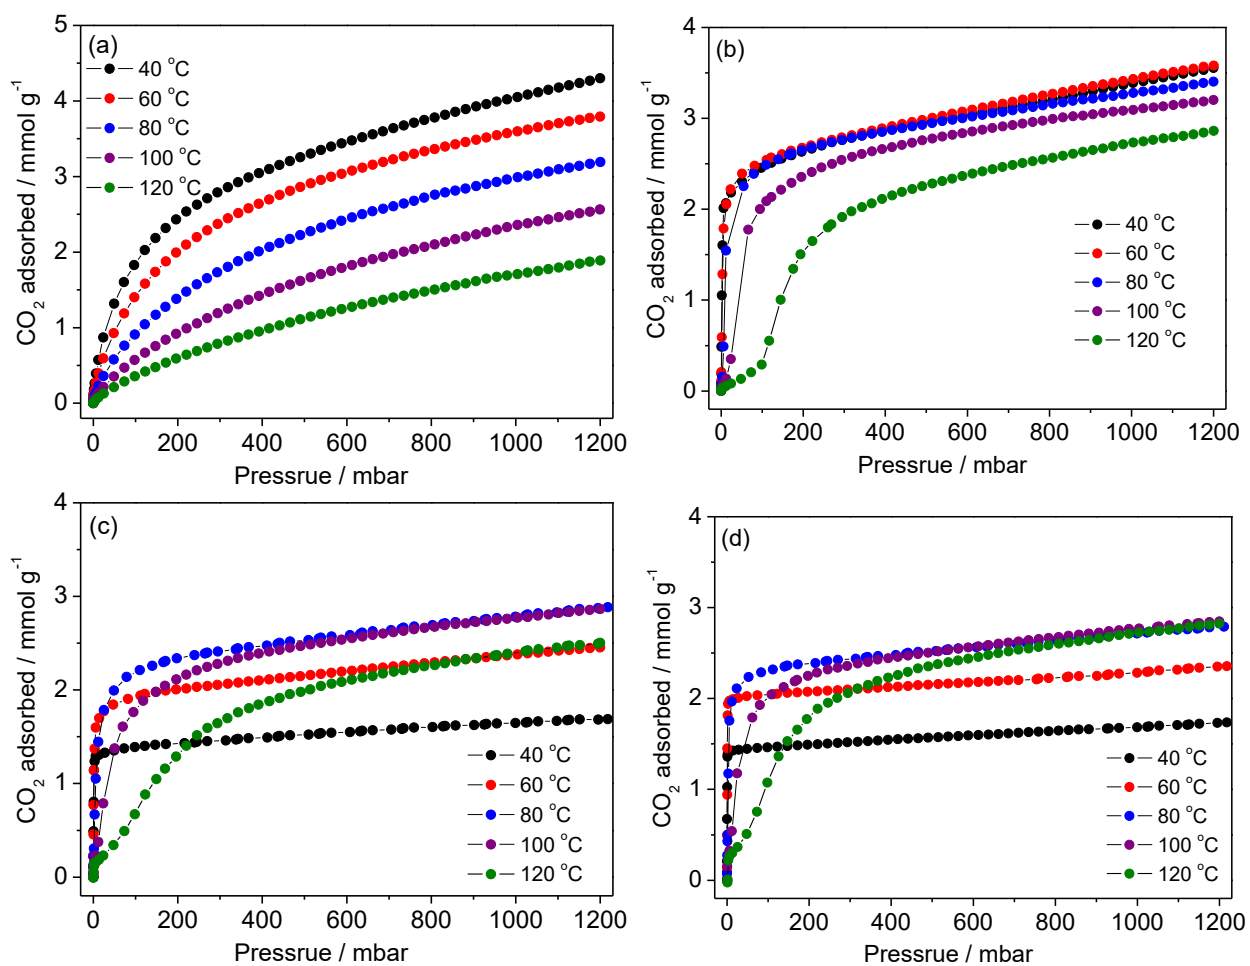

**Fig. S13** Adsorption isotherms of CO<sub>2</sub> for (a) T02, (b) T2, (c) T20, and (d) T200 on a linear scale. Measurement temperatures were indicated in the inset of the graph.

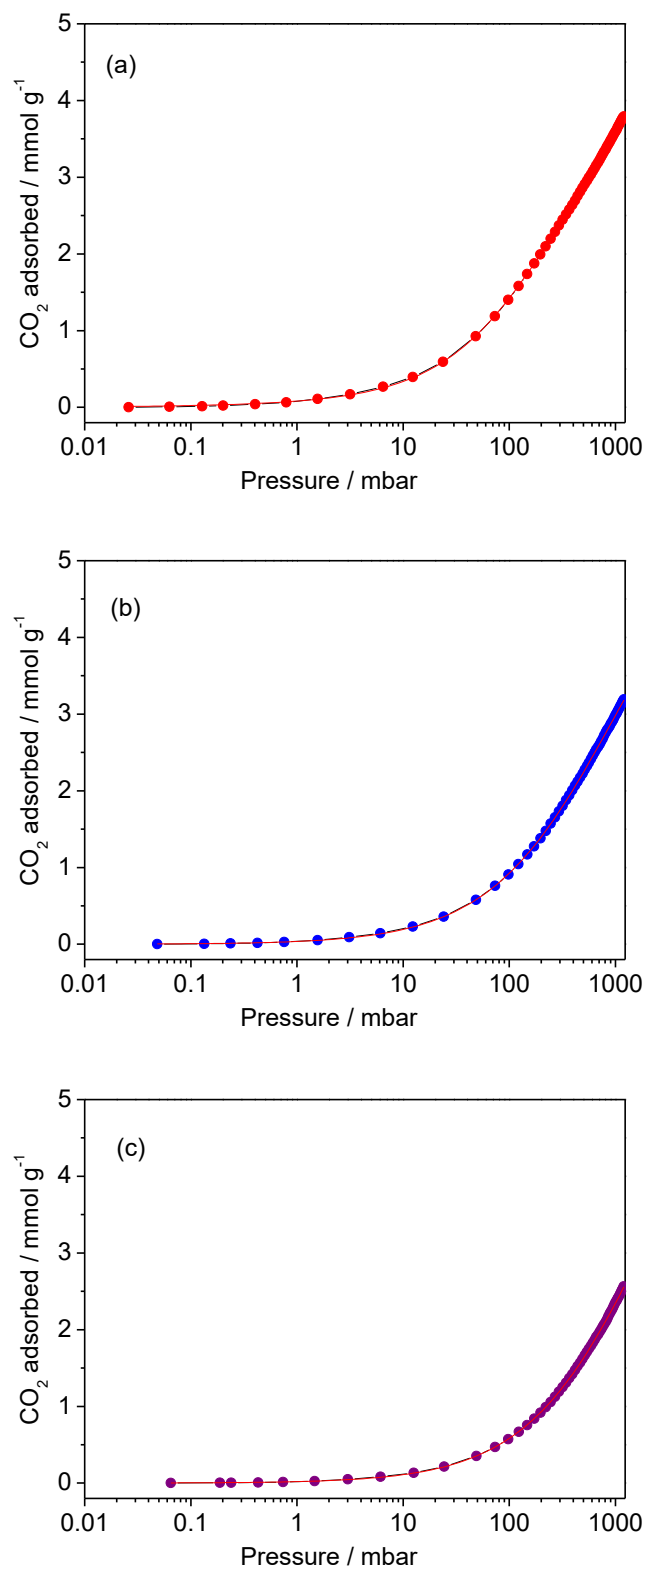

**Fig. S14**  $\text{CO}_2$  adsorption isotherms of **T02** at (a) 60 °C, (b) 80 °C, and (c) 100 °C, fitted by a dual-site Langmuir-Freundlich equation.

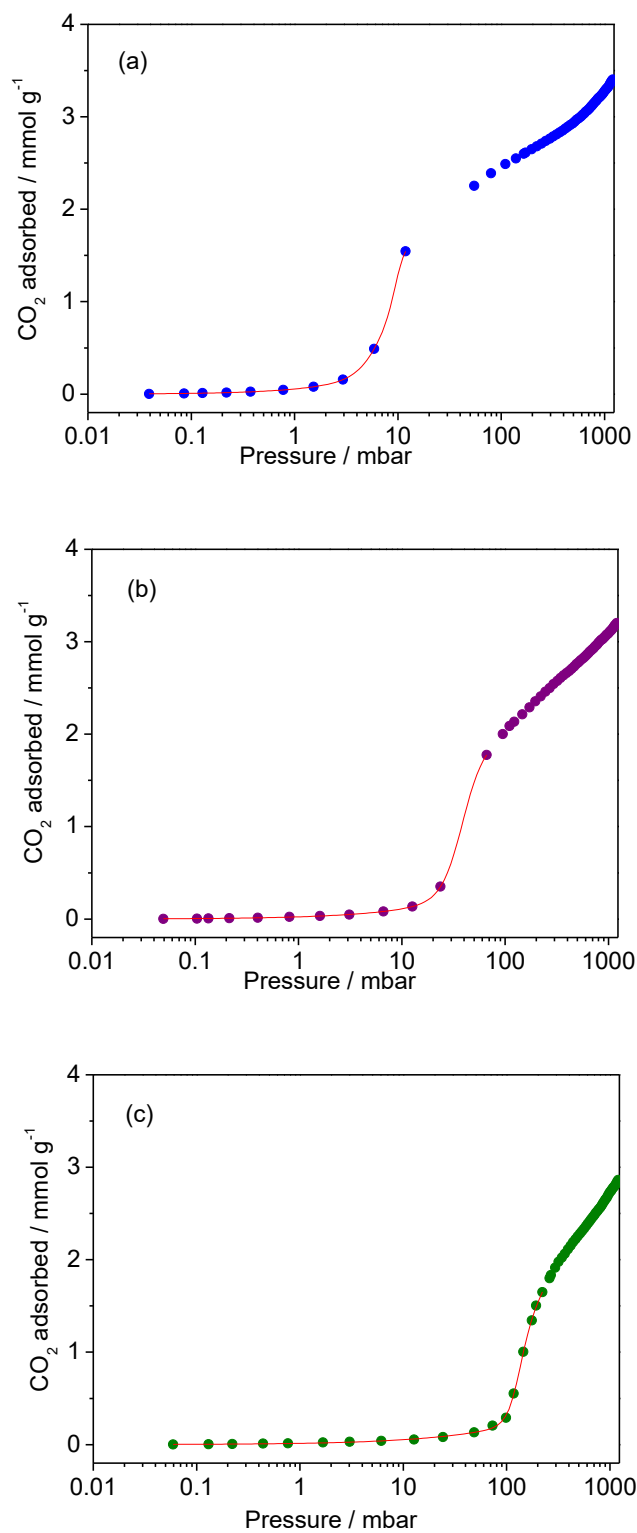

**Fig. S15** CO<sub>2</sub> adsorption isotherms of T2 at (a) 80 °C, (b) 100 °C, and (c) 120 °C, fitted by a dual-site Langmuir-Freundlich equation.

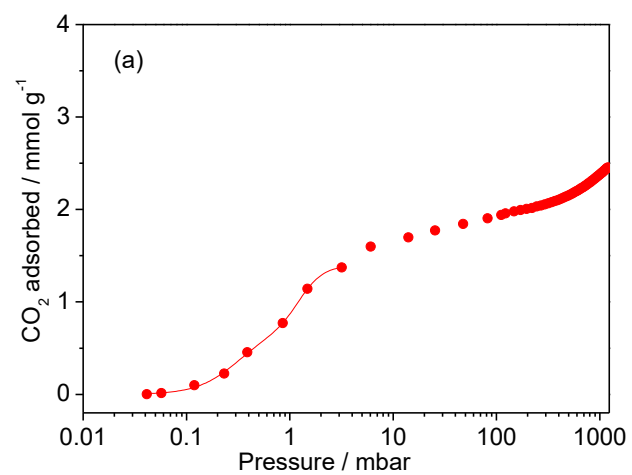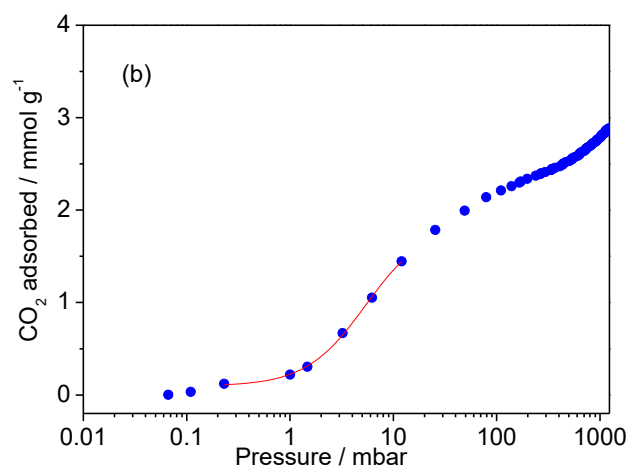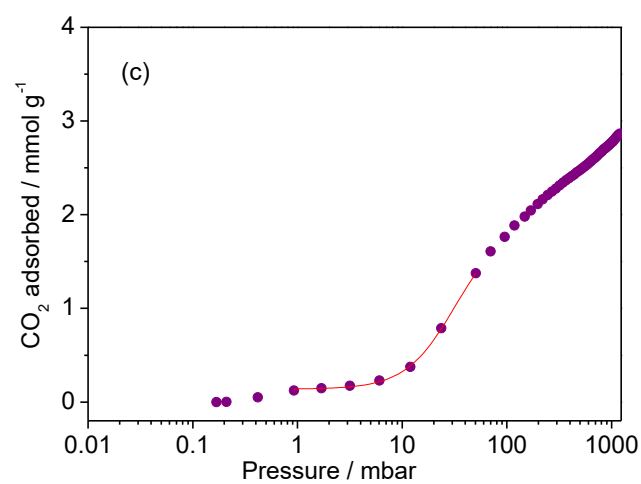

**Fig. S16** CO<sub>2</sub> adsorption isotherms of **T20** at (a) 60 °C, (b) 80 °C, and (c) 100 °C, fitted by a dual-site Langmuir-Freundlich equation.

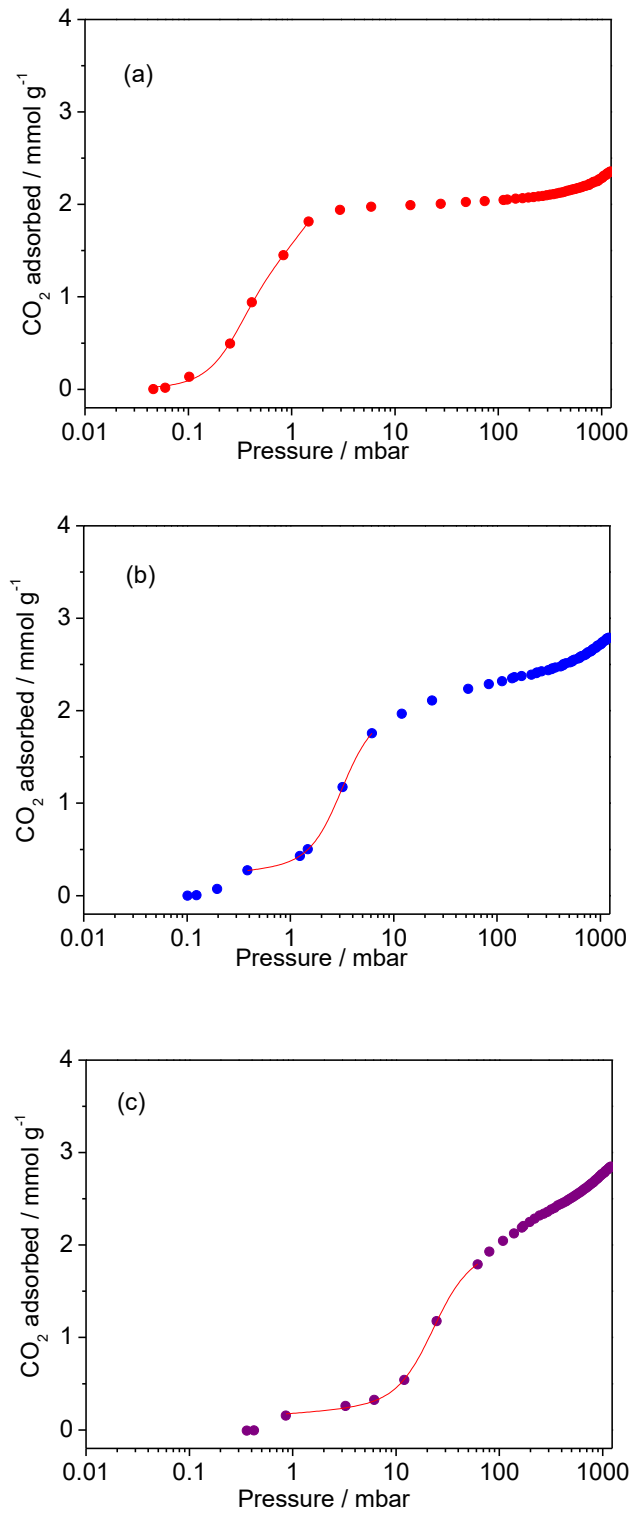

**Fig. S17** CO<sub>2</sub> adsorption isotherms of T200 at (a) 60 °C, (b) 80 °C, and (c) 100 °C, fitted by a dual-site Langmuir-Freundlich equation.



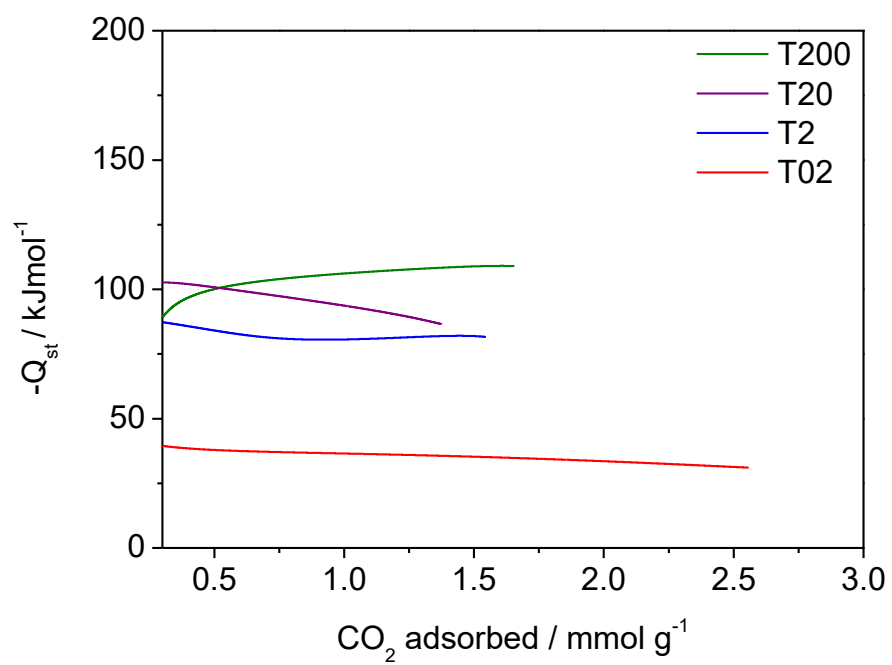

**Fig. S18** Isosteric heats of  $\text{CO}_2$  adsorption for **T02**, **T2**, **T20**, and **T200**, as calculated using the Clausius-Clapeyron relation.

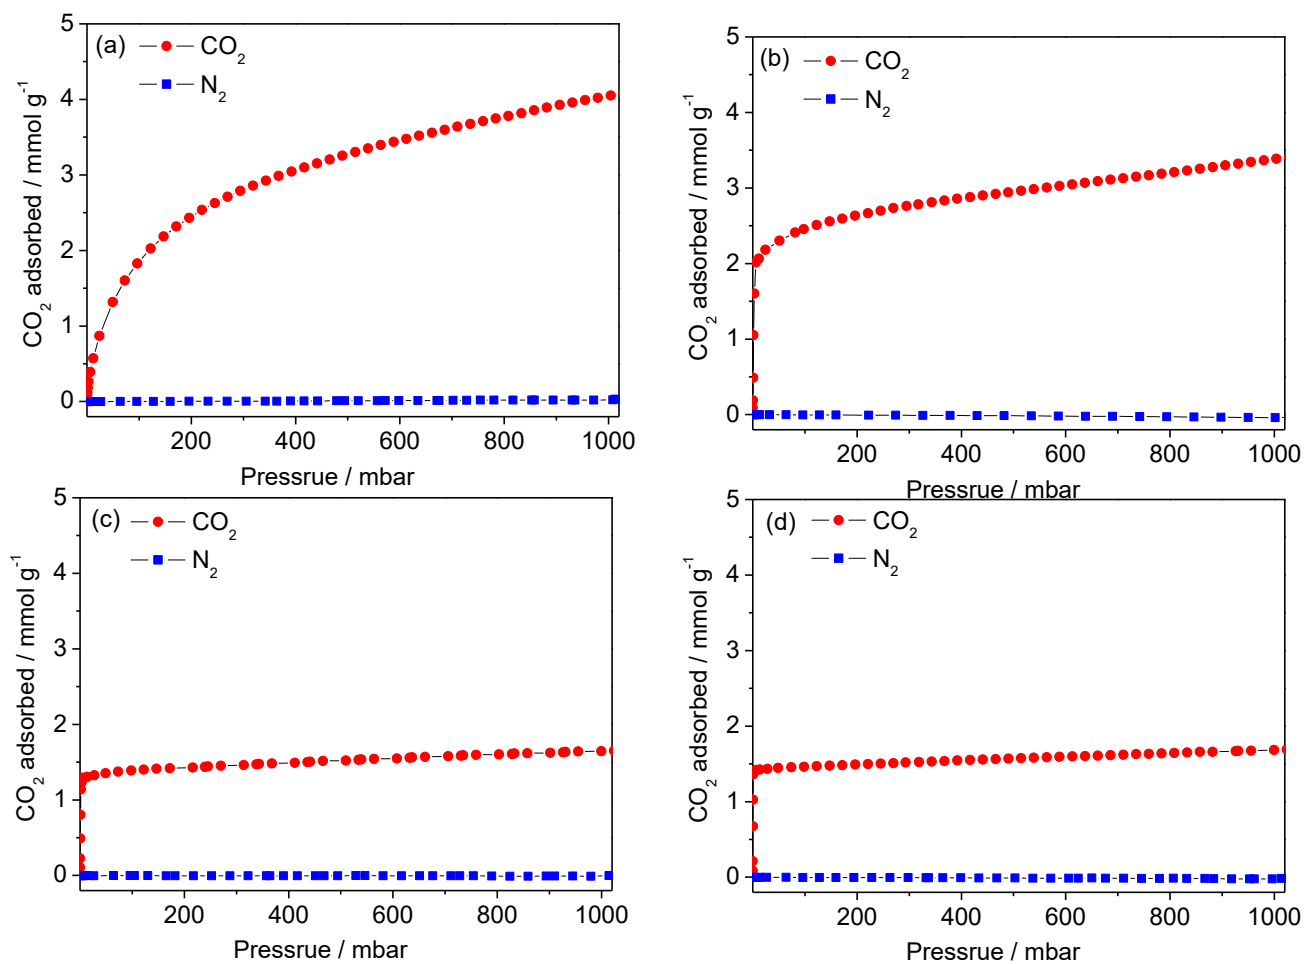

**Fig S19** CO<sub>2</sub> and N<sub>2</sub> isotherms of (a) **T02**, (b) **T2**, (c) **T20**, and (d) **T200** at 40 °C.

|             | CO <sub>2</sub> uptake <sup>a</sup> (mmol/g) | N <sub>2</sub> uptake <sup>b</sup> (mmol/g) | Selectivity |
|-------------|----------------------------------------------|---------------------------------------------|-------------|
| <b>T02</b>  | 2.17                                         | 0.02                                        | 542         |
| <b>T2</b>   | 2.53                                         | 0.01                                        | 1265        |
| <b>T20</b>  | 1.43                                         | 0.006                                       | 1191        |
| <b>T200</b> | 1.46                                         | 0.007                                       | 1042        |

<sup>a</sup> CO<sub>2</sub> uptake determined 150 mbar and 40 °C. <sup>b</sup> N<sub>2</sub> uptake determined 750 mbar and 40 °C.

**Table. S3** CO<sub>2</sub> and N<sub>2</sub> gas adsorptions of teпа-grafted MOFs.

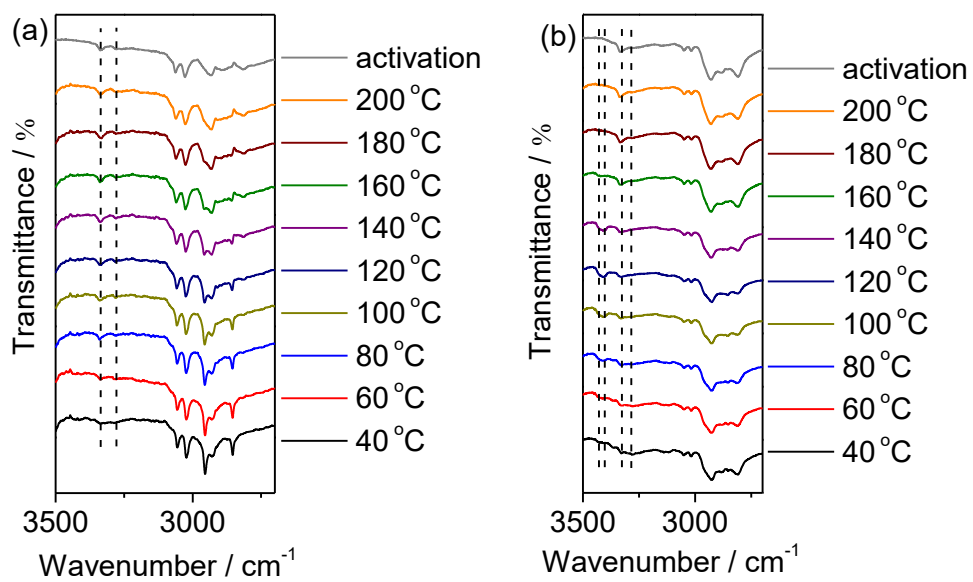

**Fig. S20** In situ IR spectra of (a) T02 and (b) T20 showing N-H stretching vibrations. The IR data denote the peak changes over temperature under 100%  $\text{CO}_2$ .

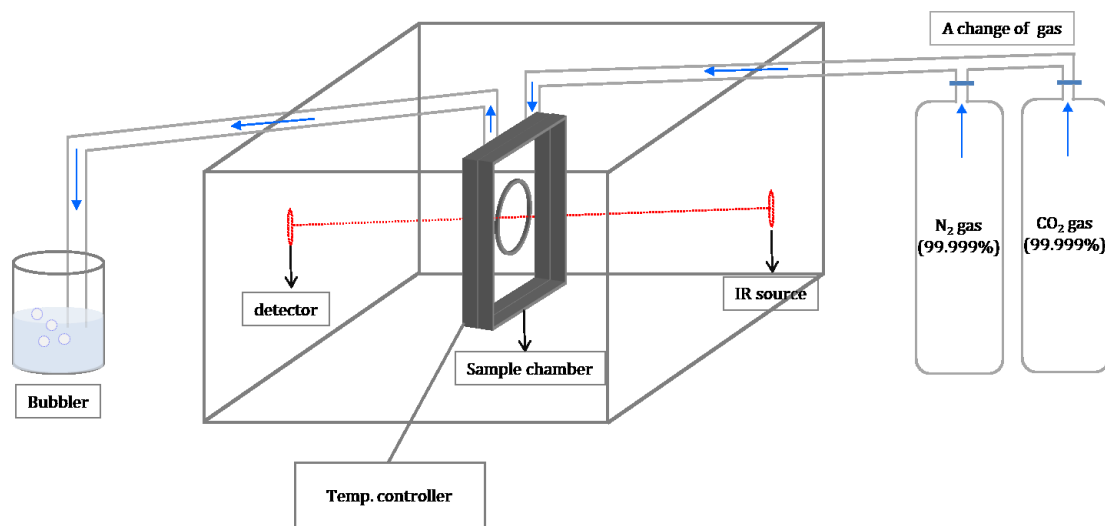

**Fig. S21** A diagram of *in situ* infrared (IR) measurement.

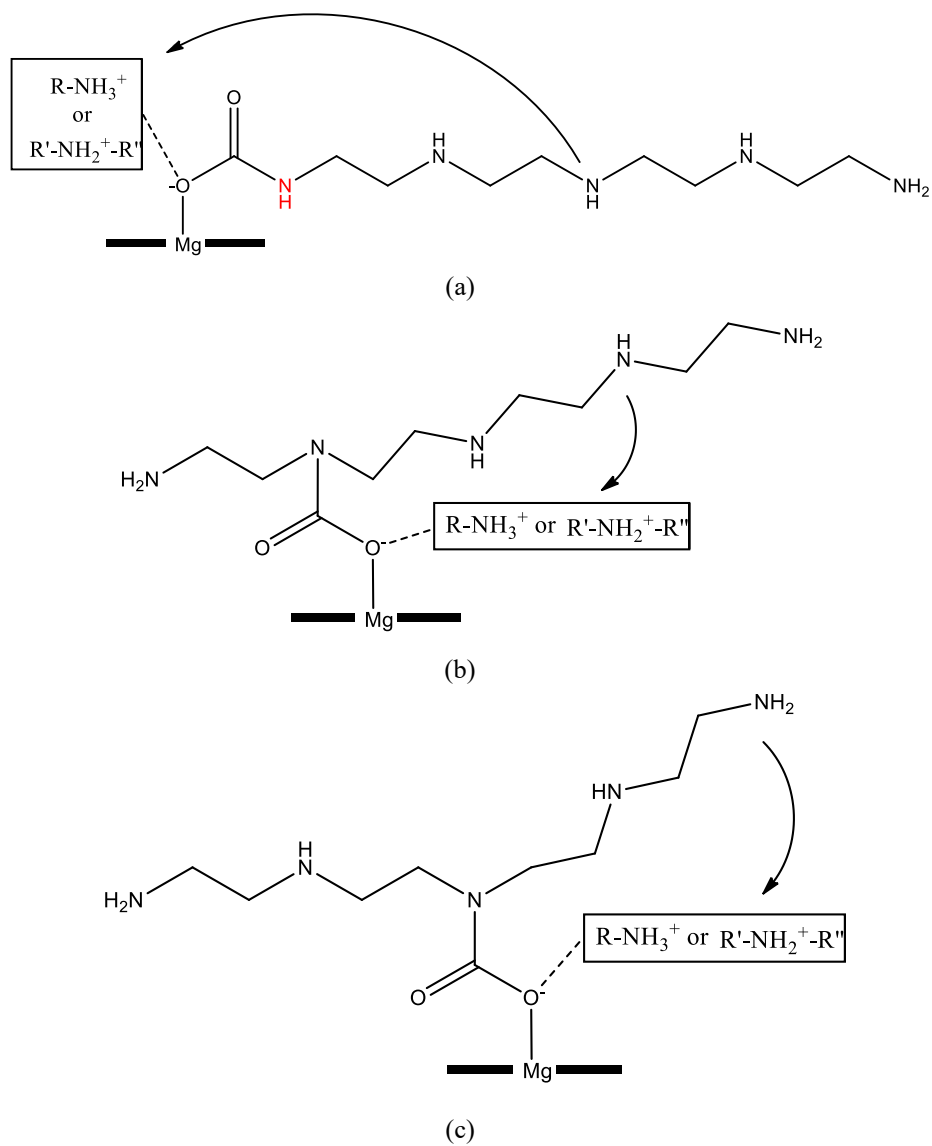

**Fig. S22** Probable CO<sub>2</sub> adsorption modes. Carbamate N-H in red (a) is newly formed as a result of carbamate formation from primary amine group. No carbamate N-H group is generated when secondary amine group is involved in carbamate formation (b, c). Dotted lines indicate ion pairing between carbamate and ammonium species. Possible patterns of ammonium cations, generated by intra- or inter-amine group, are shown in the box. Amine groups of teпа that are located away from the carbamate group could serve as ammonium ions after abstracting protons from other amine groups (arrow: a, b, c).

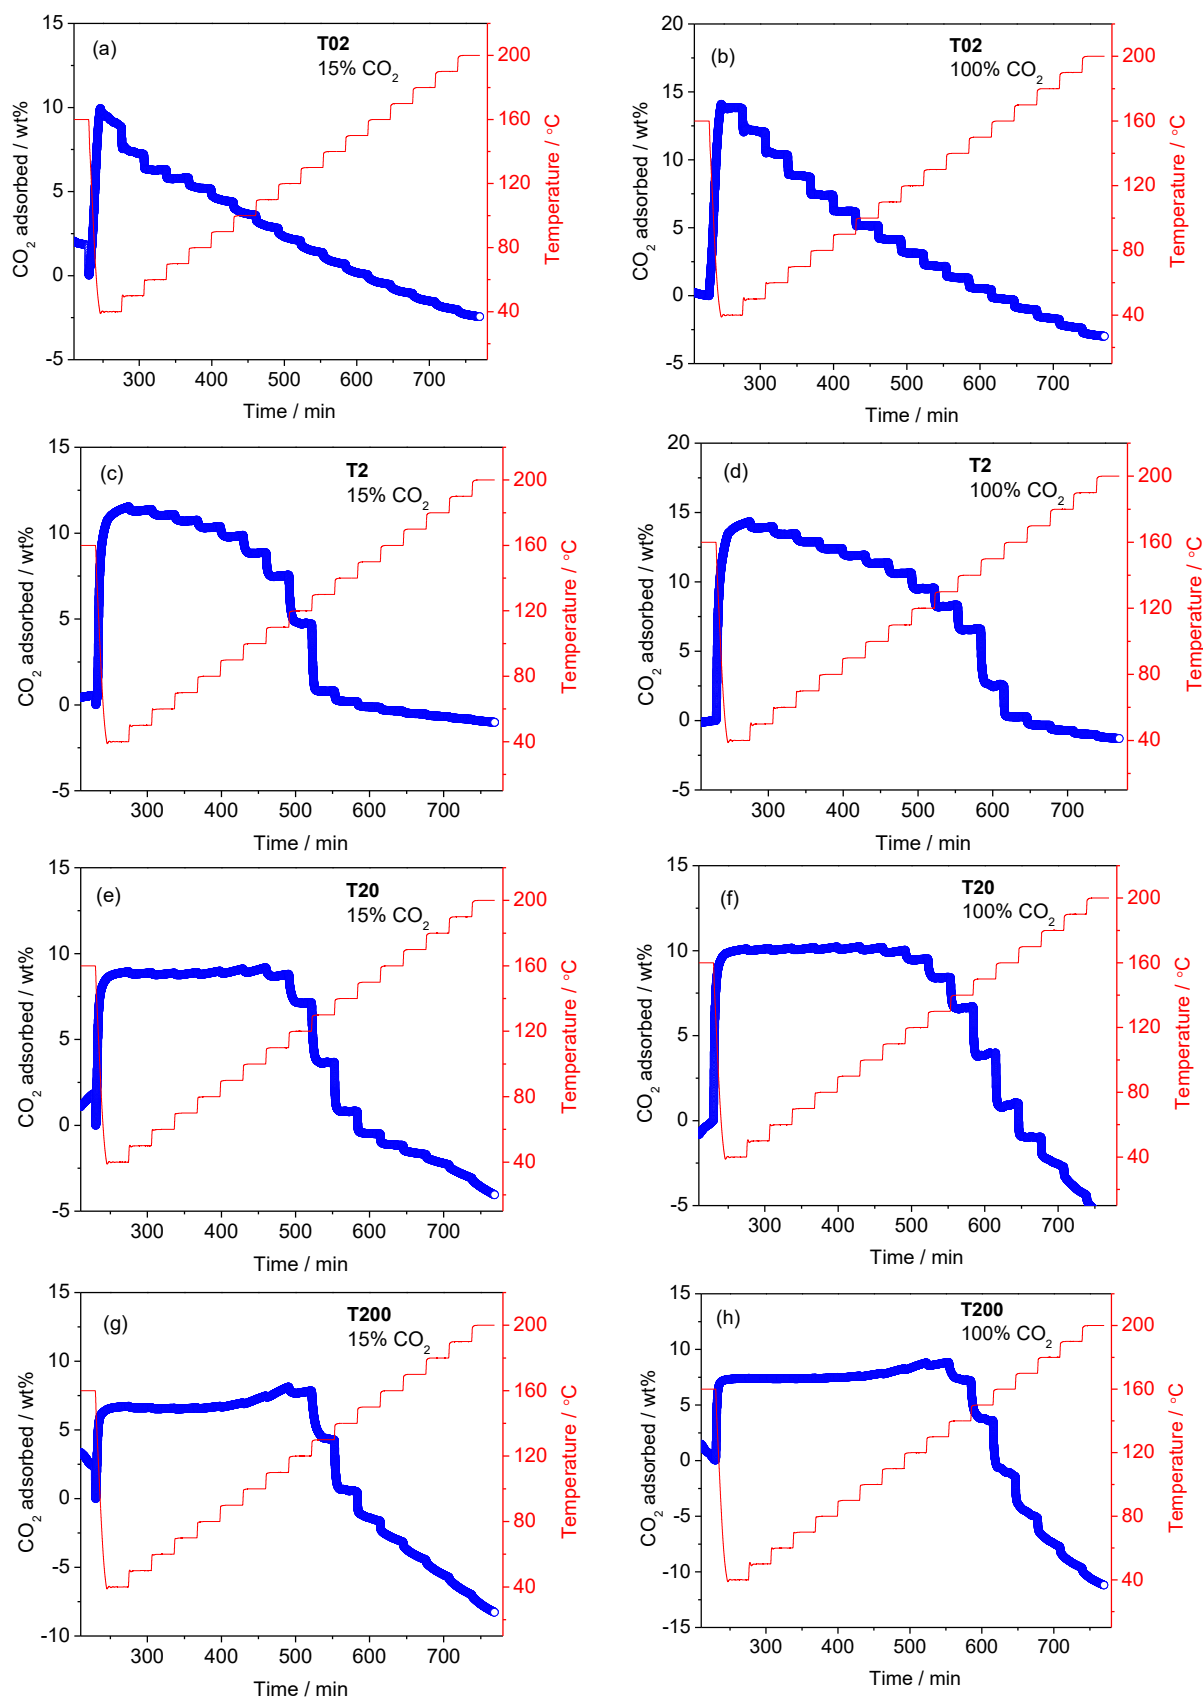

**Fig. S23** Adsorption behaviors of teпа-appended Mg<sub>2</sub>(dobpdc) at 15% and 100% CO<sub>2</sub>.

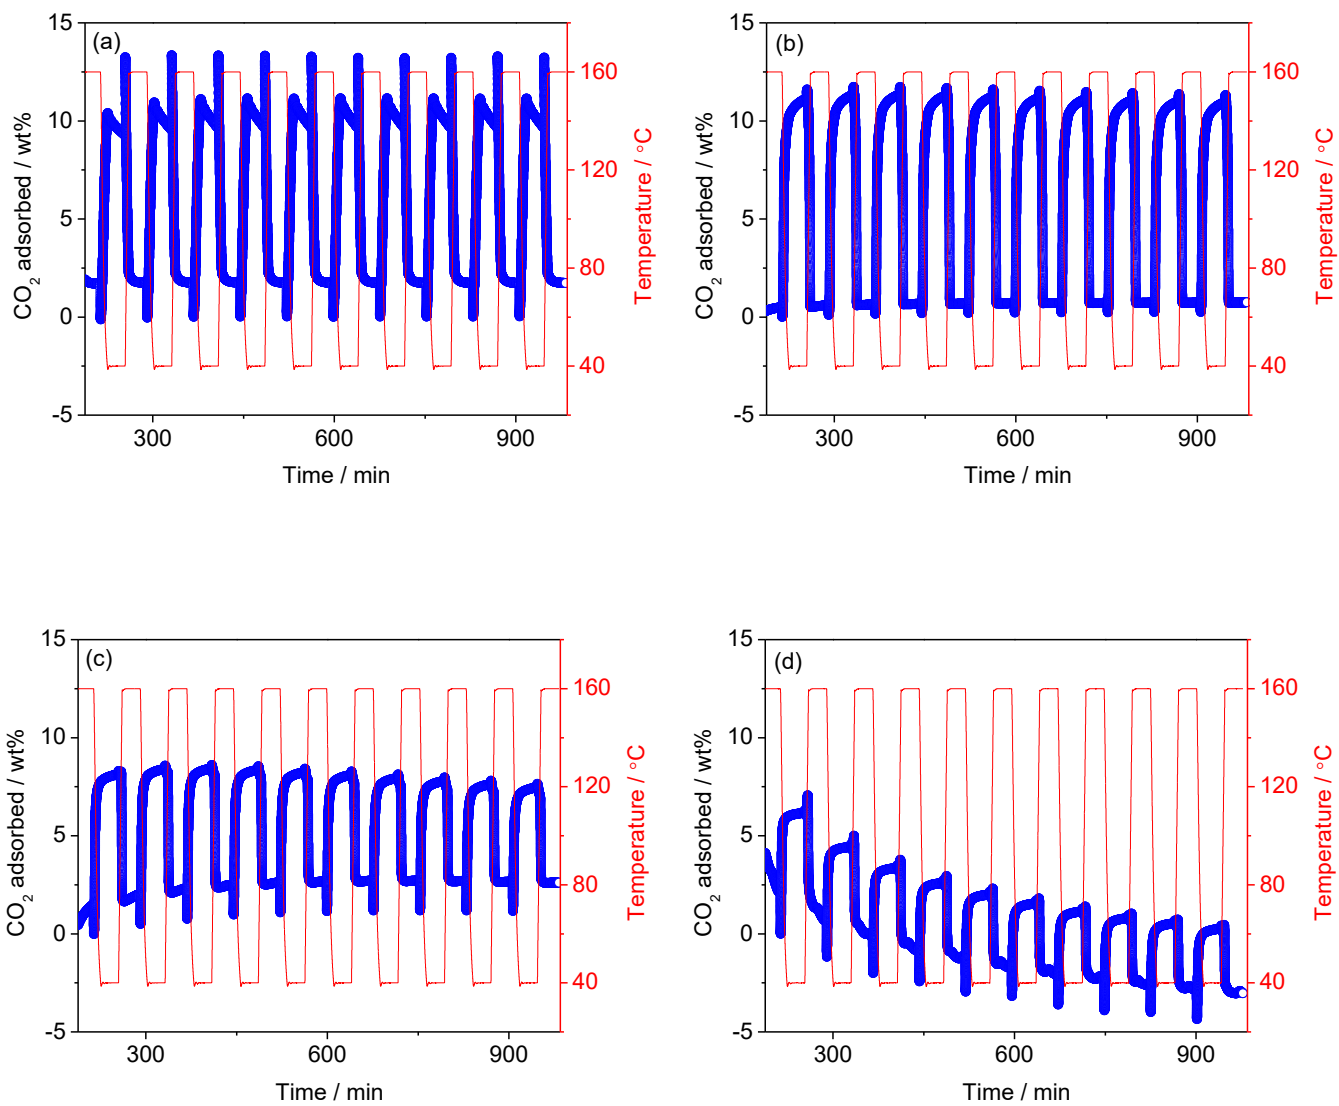

**Fig. S24** Cyclic temperature-swing adsorption of (a) T02, (b) T2, (c) T20, and (d) T200 Adsorption occurred at 40 °C and 15% CO<sub>2</sub>, while desorption happened at 100% CO<sub>2</sub> and 160 °C.

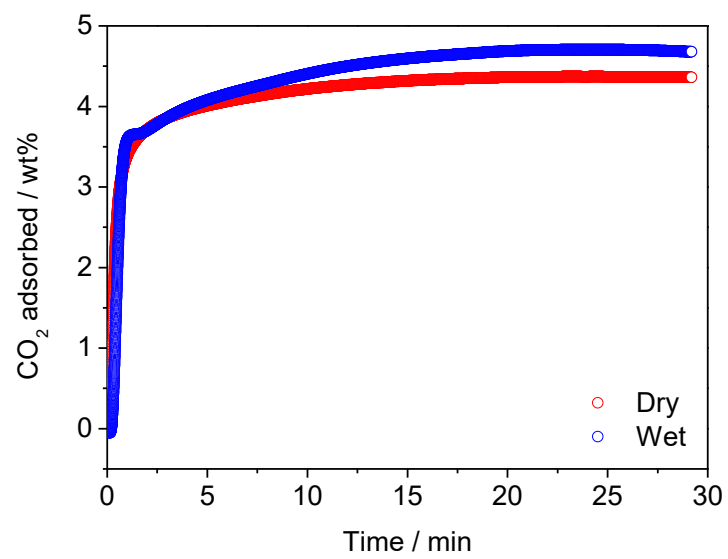

**Fig. S25** Adsorption capacity of **T200** under dry (15% CO<sub>2</sub> and 85% He) and wet (15% CO<sub>2</sub>, 3.75% H<sub>2</sub>O, and 81.25% He) conditions. The flow rate of the mixed gas was 80 mL/min.



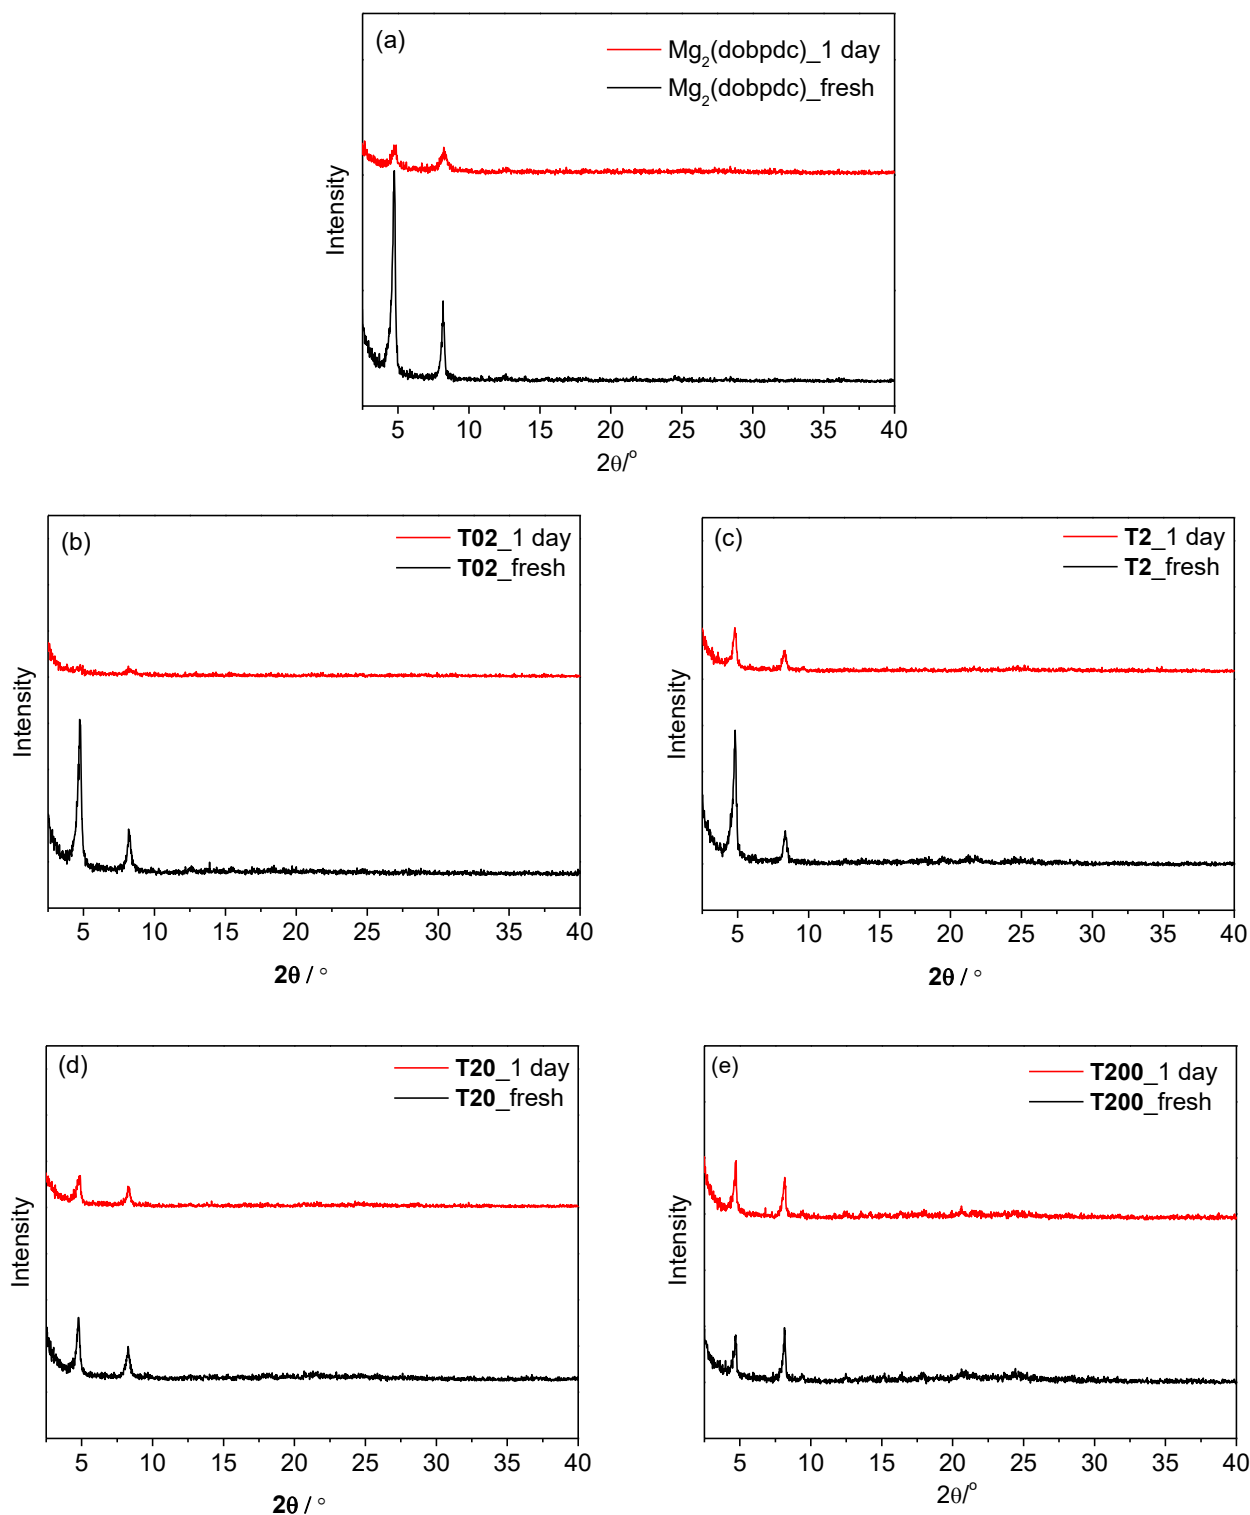

**Fig. S26** XRD profiles of (a)  $\text{Mg}_2(\text{dobpdc})$ , (b) T02, (c) T2, (d) T20 and (e) T200 before and after exposure to a mixture gas of 10%  $\text{H}_2\text{O}$  balanced by  $\text{N}_2$  at  $80^\circ\text{C}$  for 1 day.
